# Supplementary material for: Association of Timing of Electrocardiogram Acquisition After Return of Spontaneous Circulation With Coronary Angiography Findings in Patients With Out-of-Hospital Cardiac Arrest
Source: PubMed Central journal article supplement (PMC7801935; doi:10.1001/jamanetworkopen.2020.32875), 2021-01-11
Supplement: jamanetwopen-e2032875-s001.pdf [file jamanetwopen-e2032875-s001.pdf]

## Supplementary Online Content

Baldi E, Schnaubelt S, Caputo ML, et al. Association of timing of electrocardiogram acquisition after return of spontaneous circulation with coronary angiography findings in patients with out-of-hospital cardiac arrest. *JAMA Netw Open*. 2021;4(1):e2032875. doi:10.1001/jamanetworkopen.2020.32875

**eTable 1.** Comparison of Patients' and OHCAs' Characteristic According to the Tertiles of ROSC-ECG Time

**eTable 2.** ECG and Coronary Angiography Characteristics According to the Tertiles of ROSC-ECG Time

**eFigure 1.** Shape of Risk of False Positive ECGs for STEMI Rate Over Time (Fractional Polynomials)

**eFigure 2.** Positive Predictive Value and Specificity of the ECG Meeting STEMI Criteria in Predicting the Need of PTCA Intervention According to the Three Tertiles of the Time From ROSC to Post-ROSC ECG

**eAppendix.** Criteria for [Coronary Angiography](#) in [Post-ROSC Patients](#)

This supplementary material has been provided by the authors to give readers additional information about their work.

**eTable 1.** Comparison of Patients' and OHCAs' Characteristic According to the Tertiles of ROSC-ECG Time

| Variable                               | ROSC-ECG time<br>≤7 mins<br>(n=123) | ROSC-ECG time 8-<br>33 mins (n=126) | ROSC-ECG time<br>>33 mins (n=121) | p-value |
|----------------------------------------|-------------------------------------|-------------------------------------|-----------------------------------|---------|
| Center, n (%)                          |                                     |                                     |                                   | <.001   |
| Pavia                                  | 66 (53.7)                           | 49 (38.9)                           | 6 (5)                             |         |
| Lugano                                 | 21 (17.1)                           | 8 (6.3)                             | 9 (7.4)                           |         |
| Vienna                                 | 36 (29.3)                           | 69 (54.8)                           | 106 (87.6)                        |         |
| Males, n (%)                           | 89 (72.4)                           | 104 (82.5)                          | 94 (77.7)                         | .16     |
| Age, years median [IQR]                | 63 [52-70]                          | 61 [54-70]                          | 61 [52-70]                        | .76     |
| OHCA location, n (%)                   |                                     |                                     |                                   | .28     |
| Home                                   | 75 (61)                             | 61 (48.4)                           | 51 (42.1)                         |         |
| Public buildings                       | 22 (17.9)                           | 30 (23.8)                           | 36 (29.8)                         |         |
| Work/Office                            | 1 (0.8)                             | 3 (2.4)                             | 5 (4.1)                           |         |
| Street                                 | 18 (14.6)                           | 22 (17.5)                           | 20 (16.5)                         |         |
| Sport                                  | 1 (0.8)                             | 2 (1.6)                             | 0 (0)                             |         |
| Others                                 | 4 (3.3)                             | 5 (4)                               | 7 (5.8)                           |         |
| Unknown                                | 2 (1.6)                             | 3 (2-4)                             | 2 (1.7)                           |         |
| EMS arrival time, mins<br>median [IQR] | 9 [7-12]                            | 9 [7-12]                            | 8.5 [7-11]                        | .30     |
| OHCA witnessed, n (%)                  |                                     |                                     |                                   | .46     |
| No                                     | 17 (13.8)                           | 16 (12.7)                           | 20 (16.5)                         |         |
| Yes, by bystander                      | 88 (71.5)                           | 89 (70.6)                           | 90 (74.4)                         |         |
| Yes, by EMS                            | 18 (14.6)                           | 21 (16.7)                           | 11 (9.1)                          |         |
| Bystander CPR †, n (%)                 | 68 (66)                             | 79 (75.2)                           | 86 (78.2)                         | .11     |
| First shockable rhythm,<br>n (%)       | 103 (83.7)                          | 111 (88.8)                          | 98 (81.7)                         | .19     |

|                                                                            |           |           |           |     |
|----------------------------------------------------------------------------|-----------|-----------|-----------|-----|
| Epinephrine administered, mg median [IQR]                                  | 2 [0-3]   | 0 [0-2]   | 1 [0-3]   | .01 |
| Number of shocks administered, median [IQR]                                | 3 [1-5]   | 2 [1-4]   | 2 [1-4]   | .47 |
| Survival at hospital discharge, n (%)                                      | 77 (63.1) | 97 (78.2) | 70 (59.3) | .01 |
| Survival at hospital discharge with good neurological outcome (CPC 1 or 2) | 62 (80.5) | 85 (88.5) | 64 (91.4) | .04 |

† Excluding EMS-witnessed

**eTable 2.** ECG and Coronary Angiography Characteristics According to the Tertiles of ROSC-ECG Time

| Post-ROSC ECG items                             | ROSC-ECG time ≤7 mins (n=123) | ROSC-ECG time 8-33 mins (n=126) | ROSC-ECG time >33 mins (n=121) | p-value |
|-------------------------------------------------|-------------------------------|---------------------------------|--------------------------------|---------|
| ROSC-ECG time, mins [IQR]                       | 4 [2-6]                       | 15.9 [10-23.2]                  | 48 [40-62.2]                   | <.001   |
| Rhythm, n (%)                                   |                               |                                 |                                | <.001   |
| <i>Sinus rhythm</i>                             | 71 (57.7)                     | 95 (75.4)                       | 103 (85.8)                     |         |
| <i>Atrial fibrillation / Atrial tachycardia</i> | 38 (30.9)                     | 27 (21.4)                       | 15 (12.5)                      |         |
| <i>Junctional or ventricular rhythm</i>         | 13 (10.6)                     | 3 (2.4)                         | 0 (0)                          |         |
| <i>Paced</i>                                    | 1 (0.8)                       | 1 (0.8)                         | 2 (1.7)                        |         |
| ECG diagnostic for STEMI, n (%)                 | 92 (74.8)                     | 63 (50)                         | 43 (35.5)                      | <.001   |
| Heart rate, bpm [IQR]                           | 101 [84-130]                  | 99.5 [79-116]                   | 91 [74.7-106]                  | <.001   |
| QRS duration, msec [IQR]                        | 120 [100-140]                 | 110 [90-132]                    | 114 [96-144]                   | .42     |
| QTc value, msec [IQR]                           | 450 [413-490]                 | 452 [423-485]                   | 484 [456-515]                  | <.001   |
| Intraventricular conduction, n (%)              |                               |                                 |                                | <.01    |
| <i>Normal</i>                                   | 75 (61)                       | 88 (69.8)                       | 77 (63.6)                      |         |
| <i>Left bundle branch block</i>                 | 12 (9.8)                      | 12 (9.5)                        | 21 (17.4)                      |         |
| <i>Right bundle branch block</i>                | 24 (19.5)                     | 18 (14.3)                       | 22 (18.2)                      |         |
| <i>Bifascicular block</i>                       | 8 (6.5)                       | 0 (0)                           | 0 (0)                          |         |
| <i>Others</i>                                   | 4 (3.3)                       | 8 (6.3)                         | 1 (0.8)                        |         |
| Arrhythmias, n (%) †                            |                               |                                 |                                | <.01    |
| <i>None</i>                                     | 60 (84.5)                     | 85 (90.4)                       | 103 (100)                      |         |
| <i>Ventricular ectopy</i>                       | 9 (12.7)                      | 5 (5.3)                         | 0 (0)                          |         |
| <i>Supraventricular ectopy</i>                  | 2 (2.8)                       | 4 (4.3)                         | 0 (0)                          |         |

|                                                    |             |                |                |       |
|----------------------------------------------------|-------------|----------------|----------------|-------|
| Numbers of segments with ST elevation, n (%)       |             |                |                | <.001 |
| <i>None</i>                                        | 26 (21.1)   | 56 (44.4)      | 65 (53.7)      |       |
| <i>One</i>                                         | 43 (35)     | 33 (26.2)      | 28 (23.1)      |       |
| <i>Two</i>                                         | 37 (30.1)   | 33 (26.2)      | 14 (11.6)      |       |
| <i>Three</i>                                       | 16 (13)     | 2 (1.6)        | 10 (8.3)       |       |
| <i>Four</i>                                        | 1 (0.8)     | 2 (1.6)        | 4 (3.3)        |       |
| <b>Coronary angiography items</b>                  |             |                |                |       |
| ECG-angiography time, mins [IQR]                   | 90 [64-131] | 104.5 [65-264] | 107 [64-403.5] | .17   |
| Normal coronary angiography, n (%)                 | 18 (14.6)   | 22 (17.5)      | 31 (25.6)      | .08   |
| Number of vessels with significant stenosis, n (%) |             |                |                | .47   |
| <i>None</i>                                        | 21 (17.1)   | 27 (21.4)      | 32 (26.4)      |       |
| <i>One-vessel</i>                                  | 38 (30.9)   | 39 (31)        | 36 (29.8)      |       |
| <i>Two-vessels</i>                                 | 30 (24.4)   | 31 (24.6)      | 20 (16.5)      |       |
| <i>Three-vessels</i>                               | 34 (27.6)   | 29 (23)        | 33 (27.3)      |       |
| Number of vessels treated with PTCA, n (%)         |             |                |                | .21   |
| <i>None</i>                                        | 39 (31.7)   | 36 (28.6)      | 38 (31.4)      |       |
| <i>One-vessel</i>                                  | 58 (47.2)   | 55 (43.7)      | 40 (33.1)      |       |
| <i>Two-vessels</i>                                 | 14 (11.4)   | 18 (14.3)      | 20 (16.5)      |       |
| <i>Three-vessel</i>                                | 12 (9.8)    | 17 (13.5)      | 23 (19)        |       |

† Considering only ECG with sinus rhythm

**eFigure 1.** Shape of Risk of False Positive ECGs for STEMI Rate Over Time (Fractional Polynomials)

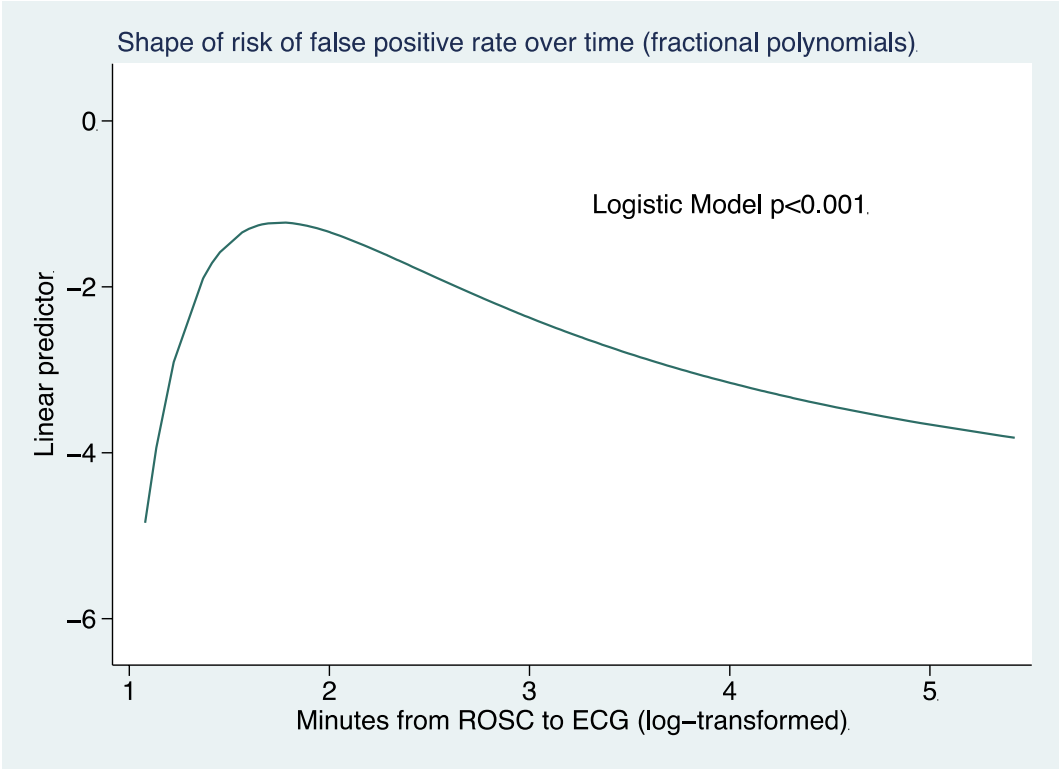

**eFigure 2.** Positive Predictive Value and Specificity of the ECG Meeting STEMI Criteria in Predicting the Need of PTCA Intervention According to the Three Tertiles of the Time From ROSC to Post-ROSC ECG

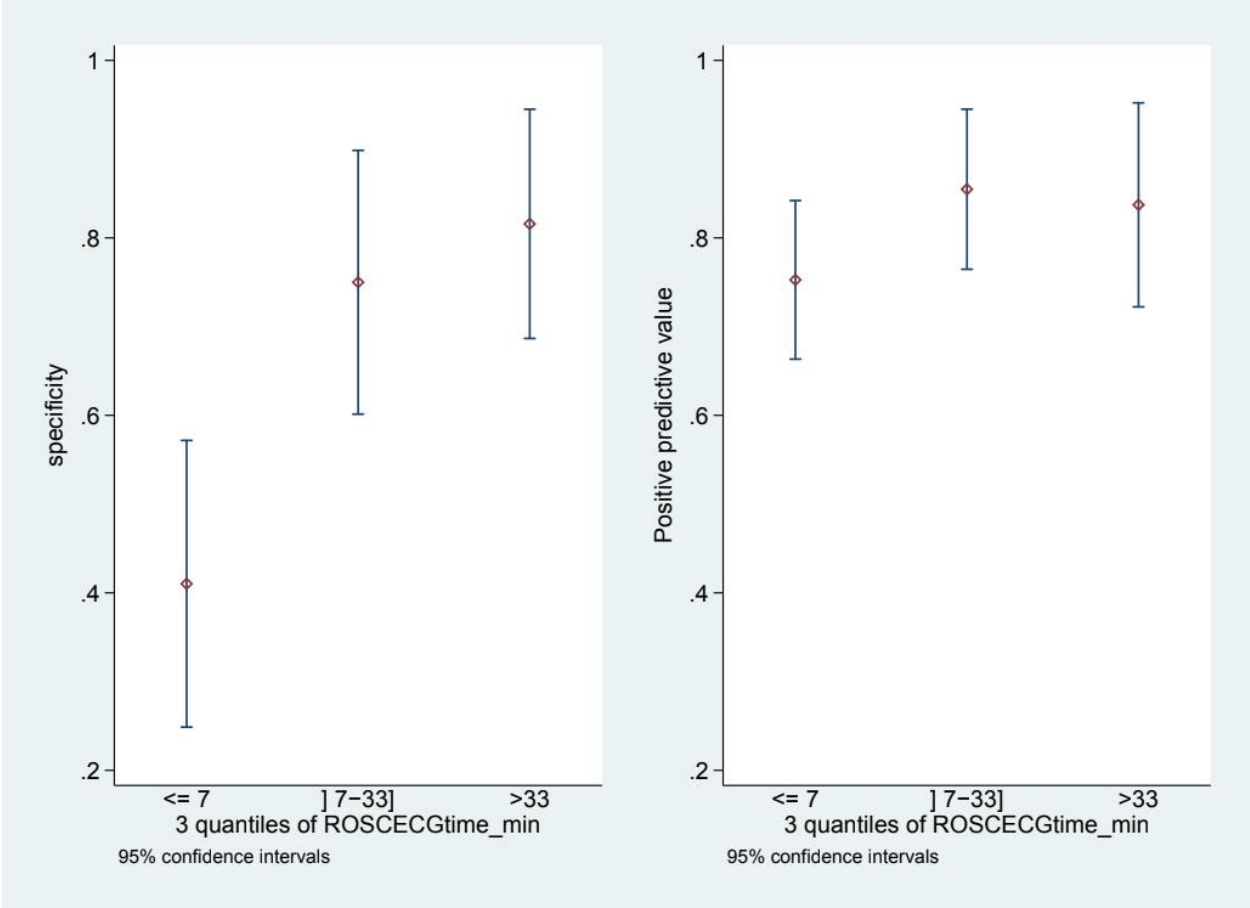

## **eAppendix.** Criteria for Coronary Angiography in Post-ROSC Patients

**Fondazione IRCCS Policlinico San Matteo, Pavia, Italy:** A primary percutaneous coronary intervention (PCI) is performed in patients resuscitated from out-of-hospital cardiac arrest (OHCA) and with a post-ROSC ECG meeting STEMI criteria. Regarding patients with a post-ROSC ECG not meeting STEMI criteria, an urgent angiography is performed only in those considered at high suspicion of ongoing myocardial ischemia by the cardiologist, which usually takes into account the age and the clinical history (including symptoms before cardiac arrest).

**Cardiocentro Ticino, Lugano, Switzerland:** A primary percutaneous coronary intervention (PCI) is performed in patients resuscitated from out-of-hospital cardiac arrest (OHCA) with a first shockable rhythm. Regarding other patients, the decision to perform an urgent angiography is done by the cardiologist taking into account, beside the ECG, the age and the clinical history (including symptoms before cardiac arrest).

**Medical University of Vienna, Vienna, Austria:** A primary percutaneous coronary intervention (PCI) in out-of-hospital cardiac arrest (OHCA) patients is performed whenever patients either meet ST-elevation myocardial infarction (STEMI) criteria in an ECG post-ROSC or when patients do not meet STEMI-criteria, but are highly suspicious of acute coronary syndrome or cardiac etiology of OHCA. This latter decision is made in a multi-professional team consisting of emergency medicine physicians and cardiologists. Multiple criteria such as symptoms prior to OHCA, co-morbidities, age etc. are taken into account for the decision.
